# Supplementary material for: Catalytically active and chemically inert CdIn2S4 coating on a CdS photoanode for efficient and stable water splitting
Source: Royal Society of Chemistry journal article supplement (doi:10.1039/c7nr01170a), 2017-01-01
Supplement: c7nr01170a1.pdf [file c7nr01170a1.pdf]

Electronic Supplementary Information (ESI)

**Catalytically Active and Chemically Inert CdIn<sub>2</sub>S<sub>4</sub> Coating  
on CdS Photoanode for Efficient and Stable Water Splitting**

Ji-Peng Song,<sup>a</sup> Peng-Fei Yin, Jing Mao,<sup>a</sup> Shi-Zhang Qiao<sup>a,b,\*</sup>, Xi-Wen Du<sup>a\*</sup>

<sup>a</sup> Institute of New-Energy Materials, School of Materials Science and Engineering,  
Tianjin University, Tianjin, 300072, China

<sup>b</sup> School of Chemical Engineering, The University of Adelaide, Adelaide, SA 5005,  
Australia

\* Address correspondence to: [xwdu@tju.edu.cn](mailto:xwdu@tju.edu.cn) or [s.qiao@adelaide.edu.au](mailto:s.qiao@adelaide.edu.au)

## I. Experimental Section

### Materials

**Table S1.** Reagents used in the experiment.

| Chemical formula                    | Specification         | Application            | Manufacturer                                                        |
|-------------------------------------|-----------------------|------------------------|---------------------------------------------------------------------|
| CdS                                 | Analytically pure     | Reactant               | Alfa Aesar Co. Ltd.                                                 |
| Anhydrous InCl <sub>3</sub>         | Analytically pure     | Reactant               | Shanghai Aladdin<br>Biochemical Technology<br>Co.,Ltd.              |
| Na <sub>2</sub> S·9H <sub>2</sub> O | Analytically pure     | Reactant               | Shanghai Aladdin<br>Biochemical Technology<br>Co.,Ltd.              |
| Na <sub>2</sub> SO <sub>4</sub>     | Analytically pure     | Reactant               | Shanghai Macklin<br>Biochemical Co.,Ltd                             |
| Na <sub>2</sub> SO <sub>3</sub>     | Analytically pure     | Reactant               | Shanghai Macklin<br>Biochemical Co.,Ltd                             |
| CH <sub>3</sub> CH <sub>2</sub> OH  | Analytically pure     | Cleaning<br>agent      | Shanghai Aladdin<br>Biochemical Technology<br>Co.,Ltd.              |
| CH <sub>3</sub> OH                  | Analytically pure     | Reactant               | Shanghai Aladdin<br>Biochemical Technology<br>Co.,Ltd.              |
| Pt                                  | Commercial<br>product | Counter<br>electrode   | Tianjin AIDAhengsheng<br>Sicence-Technology<br>Development Co.,Ltd. |
| Ag/AgCl electrode                   | Commercial<br>product | Reference<br>electrode | Tianjin AIDAhengsheng<br>Sicence-Technology<br>Development Co.,Ltd. |

### Preparation of CdS NFAs

First, Cd NFAs were grown on fluorine-doped tin oxide (FTO) substrate in a tube furnace by a thermal evaporation process reported in our previous work.<sup>1</sup> Second, Cd NFAs and 0.07 g sulfur were closely placed in the middle of a tube furnace, heated to 280 °C and held the temperature for 0.5 h. Resultantly, the Cd NFAs were transformed into CdS NFAs in the same tube furnace. Afterwards, the CdS NFAs were immersed in the CdCl<sub>2</sub> saturated methanol solutions for 40 min and annealed at

500 °C for 1 h in nitrogen gas.

### **Preparation of CdS@CdIn<sub>2</sub>S<sub>4</sub> NFAs**

The FTO with CdS NFAs was placed in the center of a quartz tube (60 nm in a diameter), and 0.5 g anhydrous InCl<sub>3</sub> was placed 6 cm upstream from the center of the quartz tube. After the quartz tube was evacuated to a negative pressure, N<sub>2</sub> (50 sccm) was flowed in the system. The furnace was heated to 500 °C by a heating rate of 10 °C/min, kept the temperature for 10 min, and then cooled down to room temperature naturally.

### **Preparation of CdIn<sub>2</sub>S<sub>4</sub> NFAs**

The cation exchange was conducted on the CdS NFAs repeatedly for three times, and all of the parameters are same with these for the preparation of CdS@CdIn<sub>2</sub>S<sub>4</sub> NFAs. Finally, fully exchanged CdIn<sub>2</sub>S<sub>4</sub> NFAs can be obtained.

### **PEC measurements for water splitting**

The PEC hydrogen evolution was tested in a standard three electrode system under simulated AM 1.5 solar illumination. The NFAs on FTO substrate served as the work electrode, a Pt plate as the counter electrode, and Ag/AgCl as the reference electrode. The photoelectrode was sealed with nail polish, and the active area was accurately defined as 1 cm<sup>2</sup>. An aqueous solution of 0.25 M Na<sub>2</sub>S/0.35 M Na<sub>2</sub>SO<sub>3</sub> (pH 12.5) was used as electrolyte and sacrificial reagent.<sup>2-4</sup> The linear sweep voltammogram was measured by a Versastat 3 potentiostats electrochemistry workstation at a scan rate of 0.05 V s<sup>-1</sup>. A 300W Xe lamp calibrated by a standard Si solar cell was used to simulate the 1 sun illumination (100 mW cm<sup>-2</sup>), and the incident light was irradiated from the FTO side. The hydrogen evolution was detected each quarter using a gas chromatograph (GC-2014C) with a thermal conductivity detector and a molecular sieve 5 A column.

For ease of comparison, the potentials were converted and presented against the reversible hydrogen electrode (RHE) using the following equation:

$$E(vs\ RHE) = E(vs\ Ag / AgCl) + E_{Ag / AgCl}(ref) + 0.0591 V \times pH \quad (1)$$

## Characterizations

The morphologies of the CdS and CdS@CdIn<sub>2</sub>S<sub>4</sub> NFAs were observed by a Hitachi S-4800 SEM at an accelerating voltage 5 kV and a Technai G2 F20 TEM with a field emission gun operated at 200 kV. The composition was analyzed by an energy dispersive spectrometer (EDS) module attached on SEM. XRD measurement was carried out using a Bruker D/max 2500 v/pc diffractometer. XPS spectra were obtained from Axis Ultra DLD (Kratos, Japan) equipped with an Al anode X-ray tube and helium lamp (He I radiation), respectively. The diffuse reflectance spectra and transmittance spectra were examined by a Hitachi 3010 UV-vis absorption spectrometer with an integrating sphere. EIS measurements were performed on a Versastat 3 potentiostats electrochemistry workstation with a frequency range from 0.1 Hz to 100 kHz at 0 V vs. Ag/AgCl.

## II. Calculation Section

### Photo-conversion efficiency

The photo-conversion efficiency ( $\eta$ ) was estimated by <sup>5</sup>:

$$\eta = I \times (1.23 - V) / P_{light} \quad (2)$$

where  $I$  is the photocurrent density,  $V$  the bias voltage applied between the working and counter electrodes, and  $P_{light}$  the incident light intensity (100 mW cm<sup>-2</sup>).

### Charge separation efficiency $P_{charge-separation}$

The measured photocurrent density can be described as<sup>6</sup>

$$J_{photocurrent}^{H_2O} = J_{absorbed} \times P_{charge\ separation} \times P_{hole\ injection} \quad (3)$$

Where  $J_{photocurrent}^{H_2O}$  is the measured photocurrent density,  $J_{absorbed}$  is the absorption current density if all absorbed photons by given electrode are converted to electricity,  $P_{charge\ separation}$  is the charge separation efficiency and  $P_{hole\ injection}$  is the interfacial hole injection efficiency for photoanode. Since PEC experiments were carried out in the electrolyte of 0.25 M Na<sub>2</sub>S/0.35M Na<sub>2</sub>SO<sub>3</sub>, and the hole scavenger, Na<sub>2</sub>S, can consume photogenerated holes rapidly, the hole injection rate is almost 100% (

$$P_{\text{hole injection}} = 1)^6.$$

The absorption current density ( $J_{\text{absorbed}}$ ) was calculated by the following equation:

$$J_{\text{absorbed}} = q \int_{300}^{600} \phi_{\lambda} A d\lambda \quad (4)$$

where  $q$  is the electron charge,  $\phi_{\lambda}$  is the AM 1.5 G solar simulator photon flux in  $\text{m}^2/\text{s} \cdot \text{nm}$  (data obtained from National Renewable Energy Laboratory, USA),  $A$  is the fraction of incident light absorbed over the wavelength range (determined from UV-vis experiments as shown in Fig. S10a). The value of  $J_{\text{absorbed}}$  for NFAs is derived to be  $8.46 \text{ mA cm}^{-2}$  based on their absorbance data between 300-600 nm (Fig. S10b). Then, the  $P_{\text{charge-separation}}$  of CdS NFAs and CdS@CdIn<sub>2</sub>S<sub>4</sub> NFAs can be obtained using the following equation:

$$P_{\text{charge-separation}} = J_{\text{photocurrent}}^{\text{Na}_2\text{S} / \text{Na}_2\text{SO}_3} \div J_{\text{absorbed}} \quad (5)$$

where the  $J_{\text{photocurrent}}^{\text{Na}_2\text{S} / \text{Na}_2\text{SO}_3}$  is the measured photocurrent density in 0.25M Na<sub>2</sub>S/0.35M Na<sub>2</sub>SO<sub>3</sub> as shown in Fig. 2a.

### Hole injection rate

The rate of hole injection ( $P_{\text{hole injection}}$ ) can be calculated by using the following equation:

$$P_{\text{hole injection}} = J_{\text{photocurrent}}^{\text{H}_2\text{O}} / J_{\text{photocurrent}}^{\text{Na}_2\text{S} / \text{Na}_2\text{SO}_3} \quad (6)$$

where  $J_{\text{photocurrent}}^{\text{H}_2\text{O}}$  and  $J_{\text{photocurrent}}^{\text{Na}_2\text{S} / \text{Na}_2\text{SO}_3}$  are the photocurrent densities without and with the hole scavengers, as shown in Fig. S5 and Fig. 2a, respectively.

### III. Supporting Data

**Table S2.** Experimental parameters of cation exchange

|                                    | (a) | (b) | (c) | (d) | (e) |
|------------------------------------|-----|-----|-----|-----|-----|
| Temperature(°C)                    | 350 | 400 | 450 | 500 | 550 |
| Nitrogen flow rate (sccm)          | 50  | 50  | 50  | 50  | 50  |
| Reaction time (min)                | 10  | 10  | 10  | 10  | 10  |
| Amount of theInCl <sub>3</sub> (g) | 1   | 1   | 1   | 1   | 1   |

**Table S3.** Reported performance of CdS based electrodes.

| Electrode                                                 | During time and maintaining potential | J <sub>0</sub> (mAcm <sup>-2</sup> )        | Stability (J/J <sub>0</sub> ) | Reference |
|-----------------------------------------------------------|---------------------------------------|---------------------------------------------|-------------------------------|-----------|
| CdS@CdIn <sub>2</sub> S <sub>4</sub> NFAs                 | 10h, 0 V vs Ag/AgCl                   | 5.5                                         | ~0.8                          | This work |
| Nafion-coated CdS IOS                                     | 5000s, 0 V vs RHE                     | 5.68                                        | ~0.92                         | 7         |
| 3D-Branched ZnO/CdS/TiO <sub>2</sub> Nanowire Arrays      | 3000s, 0 V vs Ag/AgCl                 | half of photocurrent of 3D-Branched ZnO/CdS | ~0.80                         | 8         |
| ZnFe <sub>2</sub> O <sub>4</sub> /CdS/ZnO Nanowire Arrays | 3600s, 0 V vs Ag/AgCl                 | 3.88                                        | —                             | 9         |
| TiO <sub>2</sub> /CdS/Co-Pi Nanowire Arrays               | 2h, 0.6 V vs Ag/AgCl                  | 1.1                                         | ~0.76                         | 10        |
| carbon-coated CdS core-shell nanostructures               | —, -1 V vs Ag/AgCl                    | 0.47                                        | —                             | 11        |

### References

1. P. F. Yin, T. Ling, Y. R. Lu, Z. W. Xu, S. Z. Qiao, X. W. Du, *Adv. Mater.*, 2015, **27**, 740-745.
2. J. Brillet, J. H. Yum, M. Cornuz, T. Hisatomi, R. Solarska, J. Augustynski, M. Graetzel, K. Sivula, *Nature Photon.*, 2012, **6**, 824-828.
3. N. N. Rao, S. Dube, *Int. J. Hydrogen Energy*, 1996, **21**, 95-98.
4. J. Hensel, G. Wang, Y. Li, J. Z. Zhang, *Nano. Lett.*, 2010, **10**, 478-483.
5. G. M. Wang, Y. C. Ling, H. Y. Wang, X. Y. Yang, C. C. Wang, J. Z. Zhang, Y. Li, *Energy Environ. Sci.*, 2012, **5**, 6180-6187.

6. H. Dotan, K. Sivula, M. Grätzel, A. Rothschild, S. C. Warren, *Energy Environ. Sci.*, 2011, **4**, 958-964.
7. X. L. Zheng, J. P. Song, T. Ling, Z. P. Hu, P. F. Yin, K. Davey, X. W. Du, S. Z. Qiao, *Adv. Mater.*, 2016, **28**, 4935-4942.
8. Z. Bai, X. Yan, Y. Li, Z. Kang, S. Cao, Y. Zhang, *Adv. Energy Mater.*, 2015, **5**, 1501459.
9. S. Y. Cao, X. Q. Yan, Z. Kang, Q. J. Liang, X. Q. Liao, Y. Zhang, *Nano Energy*, 2016, **24**, 25-31.
10. G. Ai, H. Li, S. Liu, R. Mo, J. Zhong, *Adv. Func. Mater.*, 2015, **25**, 5706-5713.
11. S.C. Han, Y. Ch. Pu, L. X. Zheng, L. F. Hu, J. Z. Zhang, X. S. Fang, *J. Mater. Chem. A*, 2016, **4**, 1078-1086.

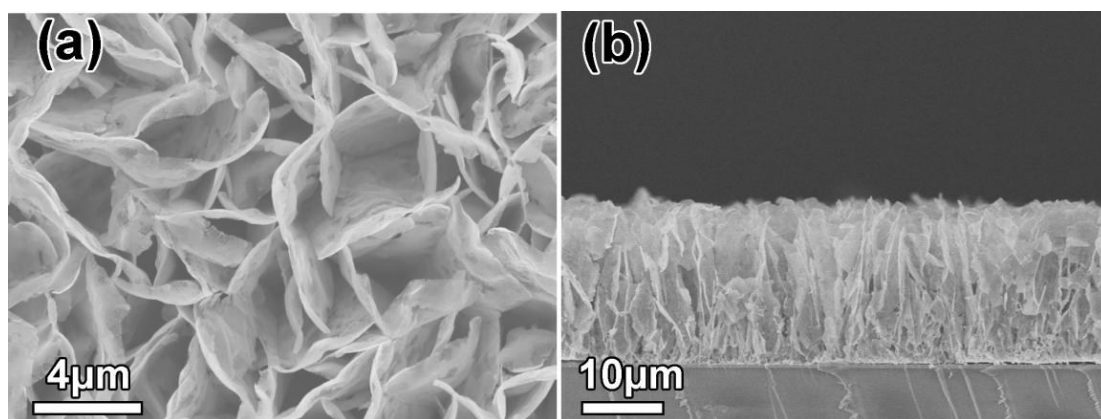

**Fig. S1** Top view and cross-sectional SEM images of CdS NFAs.

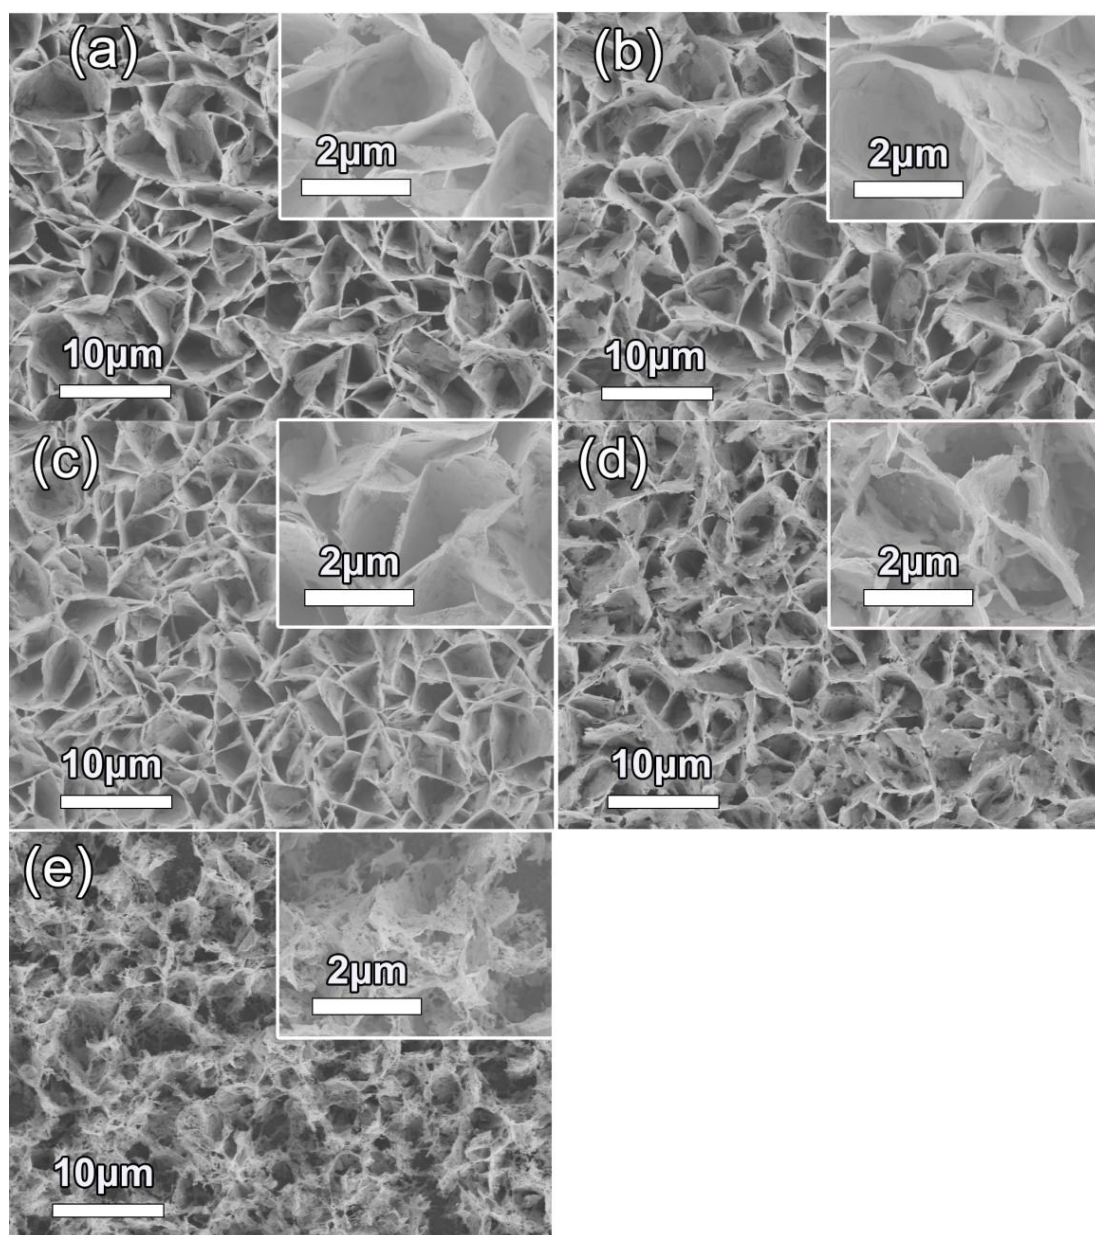

**Fig. S2** SEM images of the CdS@CdIn<sub>2</sub>S<sub>4</sub> nanoflake samples after cation exchange at (a) 350  $^{\circ}\text{C}$ , (b) 400  $^{\circ}\text{C}$ , (c) 450  $^{\circ}\text{C}$ , (d) 500  $^{\circ}\text{C}$ , (e) 550  $^{\circ}\text{C}$ .



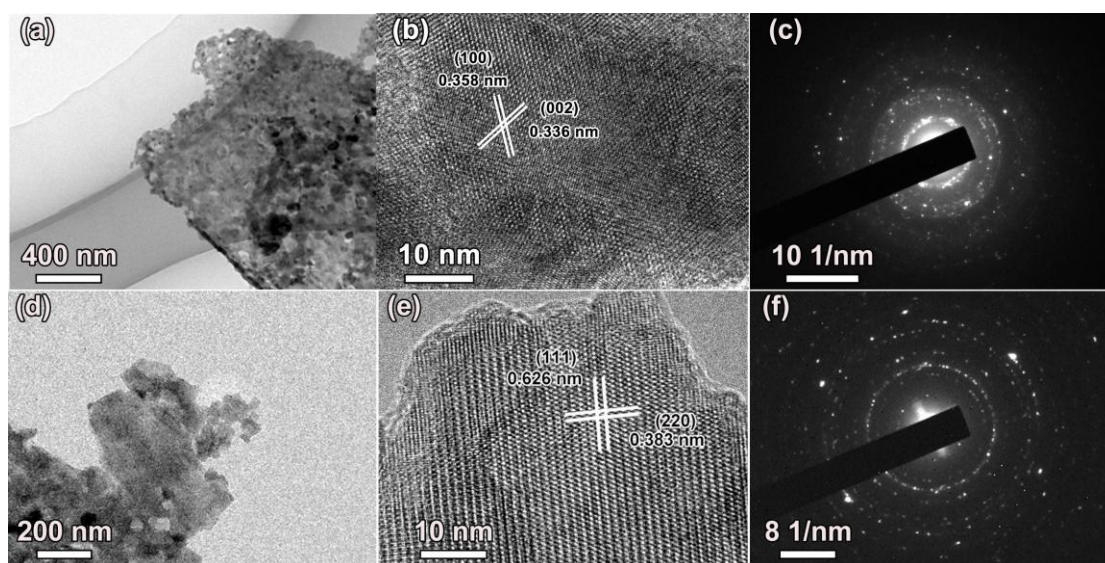

**Fig. S3** (a), (b), (c) are Typical TEM, HRTEM, SAED images of CdS NFAs, respectively. (d), (e), (f) are typical TEM, HRTEM, SAED images of CdS@CdIn<sub>2</sub>S<sub>4</sub> NFAs.

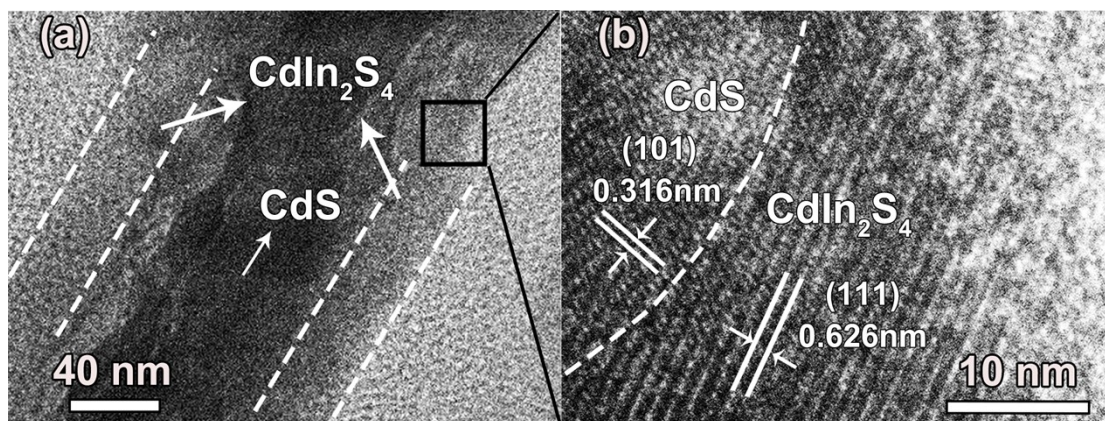

**Fig. S4** Cross-sectional TEM image of CdS@CdIn<sub>2</sub>S<sub>4</sub> nanoflake. (a) Low magnification image, (b) high resolution image.

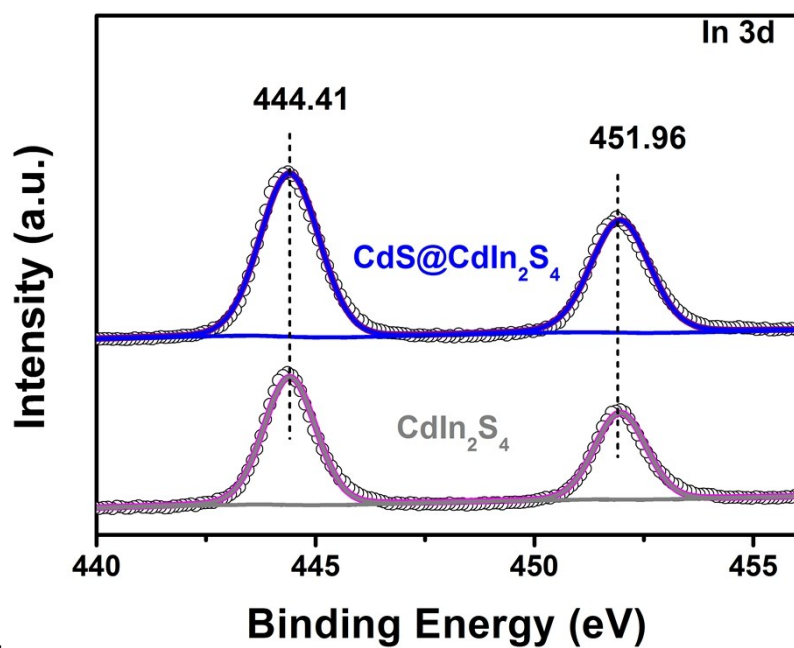

**Fig. S5** XPS spectra of In 3d peaks for  $\text{CdIn}_2\text{S}_4$  and  $\text{CdS@CdIn}_2\text{S}_4$  nanoflake arrays.

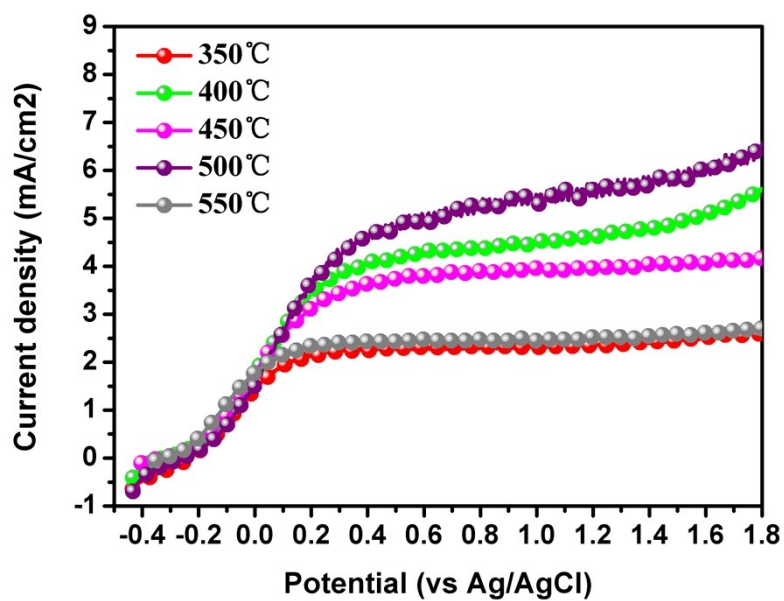

**Fig. S6** Photocurrent of  $\text{CdS@CdIn}_2\text{S}_4$  NFAs fabricated at different temperatures.

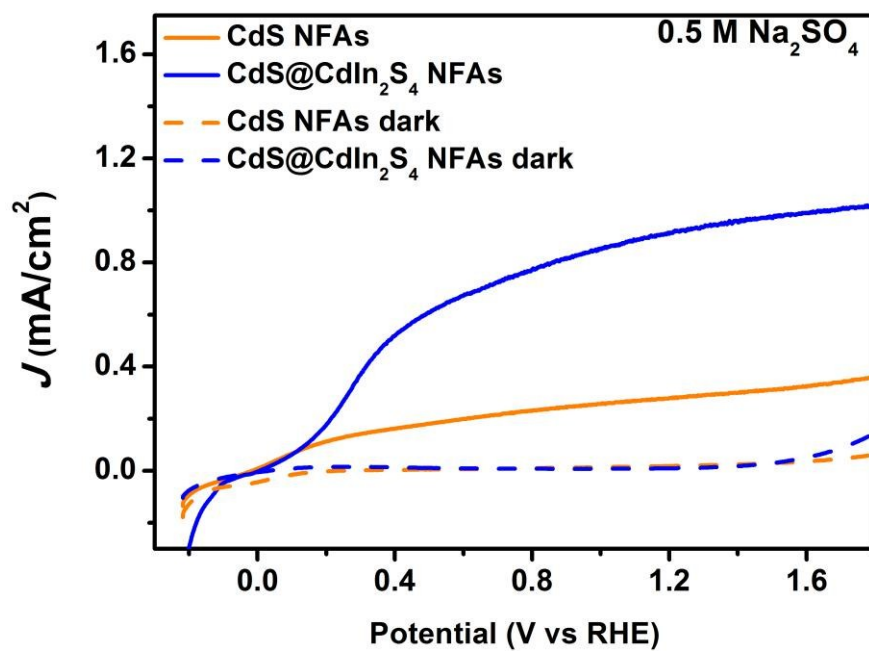

**Fig. S7** Linear sweep voltammograms measured in 0.5M Na<sub>2</sub>SO<sub>4</sub> under 1 sun AM1.5G illumination.

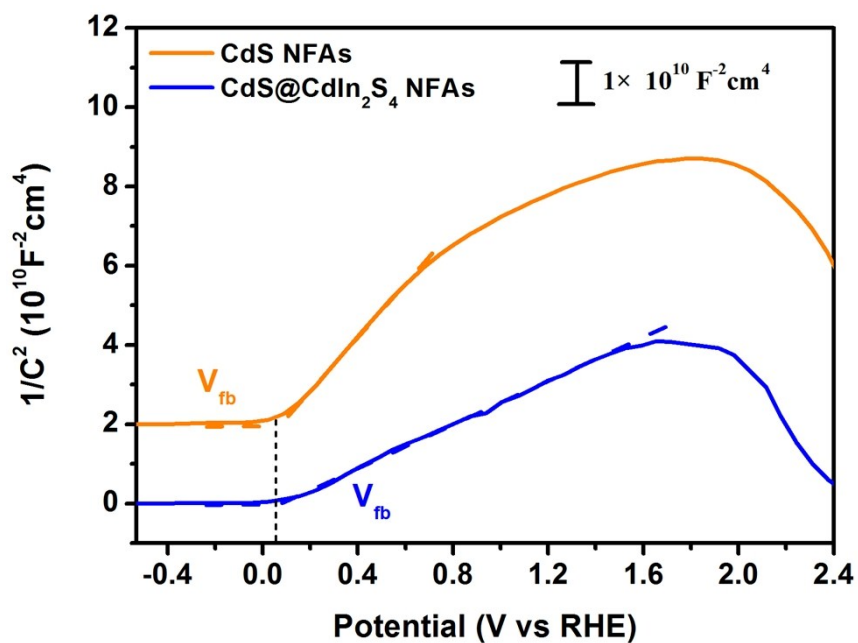

**Fig. S8** Mott-Schottky plots of CdS and CdS@CdIn<sub>2</sub>S<sub>4</sub> electrodes at 1 kHz.

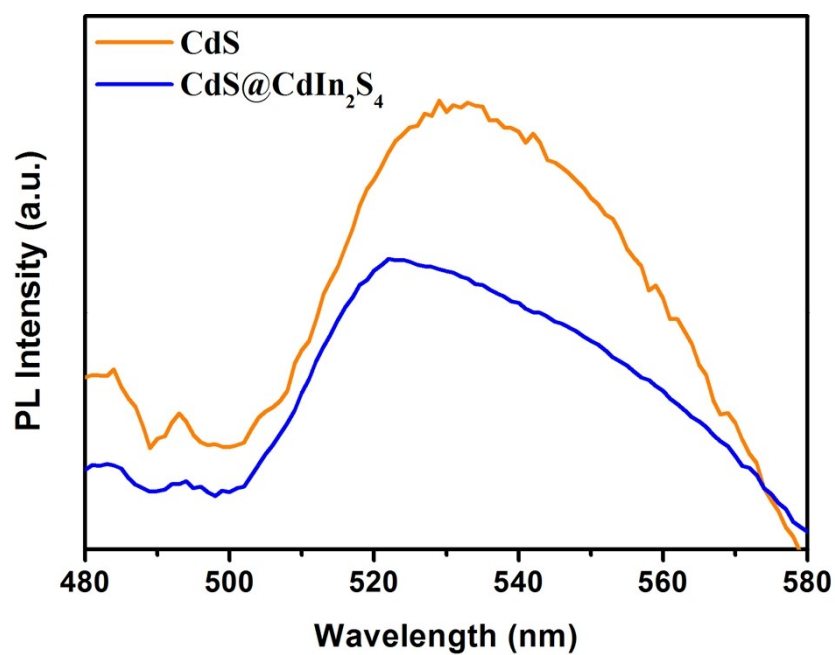

**Fig. S9** Room-temperature PL spectra of CdS NFAs (orange line) and CdS@CdIn<sub>2</sub>S<sub>4</sub> NFAs (blue line).

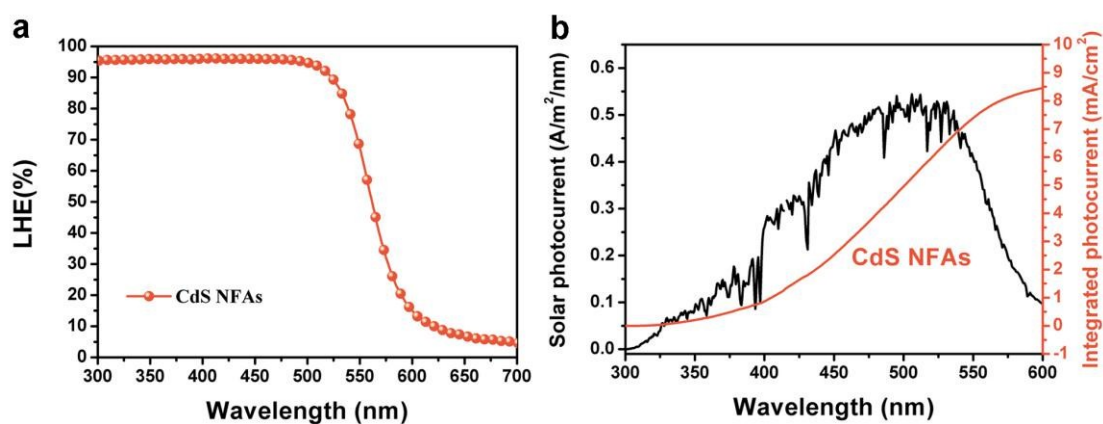

**Fig. S10** (a) LHE (light harvesting efficiency) spectra of CdS nanoflake arrays (b) Solar photocurrent spectrum (black) and the corresponding integrated photocurrent density (orange) for CdS NFAs.
